# Supplementary material
Source: PubMed Central journal article supplement (PMC5004722)
Supplement: mol-22-16_022_Boneparth_Suppl.pdf [file mol-22-16_022_Boneparth_Suppl.pdf]

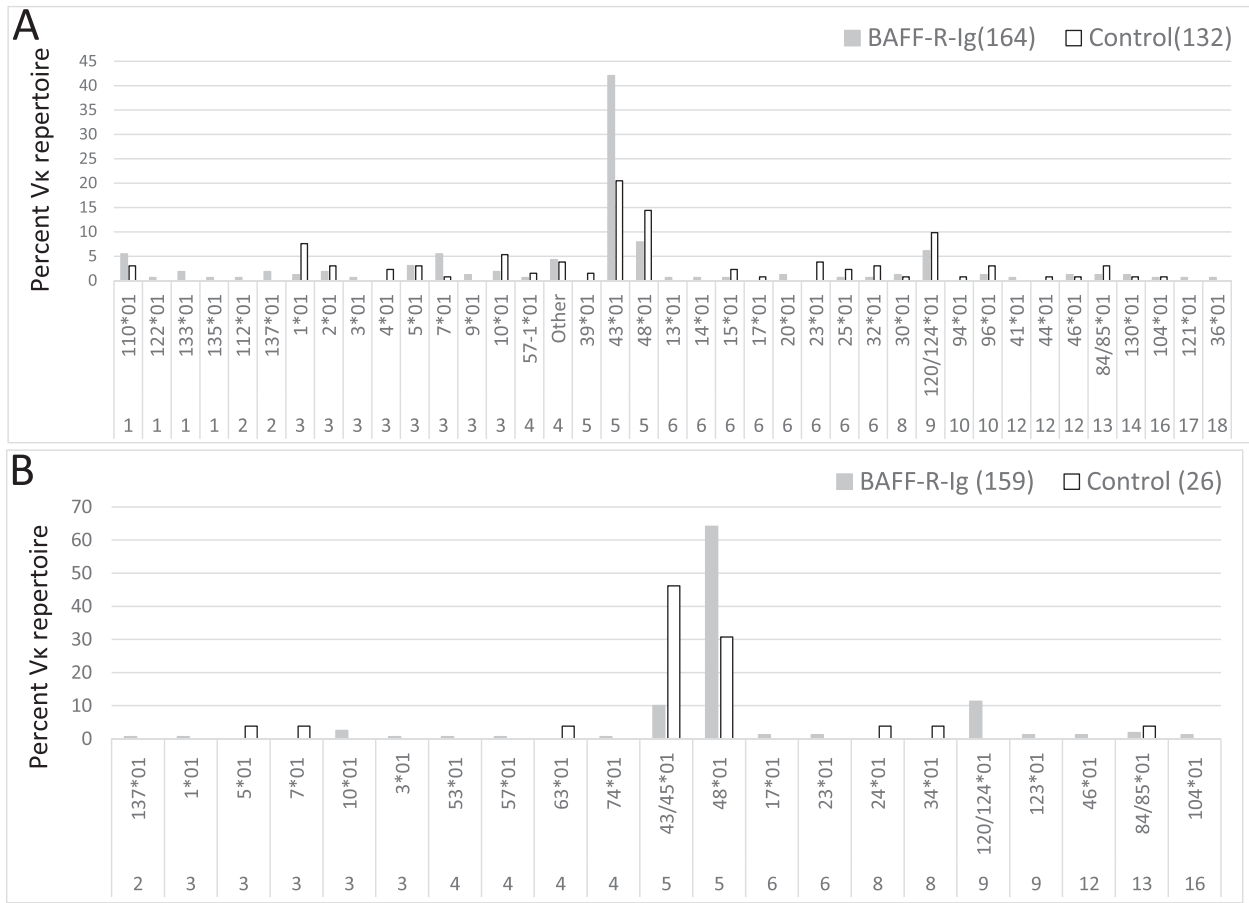

**Supplementary Figure S2.** The repertoire of V $\kappa$  light chains associated with the 3H9 heavy chain in plasma cells from NZW/BXSB (A) and NZB/W (B) chimeras. The y-axis shows percent of the total repertoire for each subset. Three to six spleens were analyzed for each subset (see Supplementary Table S2 for sequences and Supplementary Table S3 for statistical analysis).

**Supplementary Table S1.** Donor strains and chimeras.

| Chimera name        | Donor 3H9 | Recipient | Harvest (days after transplant) |
|---------------------|-----------|-----------|---------------------------------|
| M W/B WT            | M -       | M W/B     | 86 +/- 16                       |
| M W/B 3H9           | M +       | M W/B     | 95 +/- 31                       |
| M W/B 3H9 BAFF-R-Ig | M +       | M W/B     | 119 +/- 19                      |
| F WT B/W            | F -       | F B/W     | 178                             |
| F 3H9 B/W           | F +       | F B/W     | 188 +/- 50                      |
| F 3H9 B/W BAFF-R-Ig | F +       | F B/W     | 229 +/- 13                      |

**Supplementary Table S2.** 3H9 associated V $\kappa$  usage of B cell subsets from chimeric mice.

| Follicular B cells NZW/BXSB |            |           |         | Follicular B cells NZB/W |             |           |         |
|-----------------------------|------------|-----------|---------|--------------------------|-------------|-----------|---------|
| V $\kappa$ gene             | V allele   | BAFF-R-Ig | Control | V $\kappa$ gene          | V allele    | BAFF-R-Ig | Control |
| 1                           | 88*01      | 0         | 1       | 1                        | 99*01       | 3         | 1       |
| 1                           | 99*01      | 3         | 3       | 1                        | 110*01      | 1         | 3       |
| 1                           | 110*01     | 1         | 5       | 1                        | 117*01      | 0         | 1       |
| 1                           | 117*01     | 1         | 0       | 1                        | 133*01      | 0         | 2       |
| 1                           | 135*01     | 2         | 2       | 1                        | 135*01      | 5         | 3       |
| 2                           | all        | 2         | 1       | 2                        | 137*01      | 1         | 4       |
| 3                           | 1*01       | 4         | 5       | 3                        | 1*01        | 14        | 1       |
| 3                           | 2*01       | 6         | 8       | 3                        | 2*01        | 4         | 4       |
| 3                           | 3*01       | 3         | 0       | 3                        | 3*01        | 0         | 4       |
| 3                           | 4*01       | 7         | 21      | 3                        | 4*01        | 4         | 13      |
| 3                           | 5*01       | 7         | 8       | 3                        | 5*01        | 3         | 5       |
| 3                           | 7*01       | 1         | 0       | 3                        | 7*01        | 1         | 1       |
| 3                           | 10*01      | 8         | 19      | 3                        | 9*01        | 2         | 0       |
| 3                           | 12*01      | 9         | 9       | 3                        | 10*01       | 13        | 22      |
| 4                           | 53*01      | 0         | 0       | 3                        | 12*01       | 6         | 7       |
| 4                           | 55*01      | 2         | 10      | 4                        | 57*01       | 2         | 0       |
| 4                           | 57*01      | 0         | 1       | 4                        | 55*01       | 0         | 3       |
| 4                           | 57-1*01    | 3         | 8       | 4                        | 59*01       | 1         | 3       |
| 4                           | 58*01      | 1         | 1       | 4                        | 61*01       | 1         | 0       |
| 4                           | 59*01      | 0         | 0       | 4                        | 63*01       | 1         | 2       |
| 4                           | 61*01      | 1         | 0       | 4                        | 74*01       | 2         | 0       |
| 4                           | 72*01      | 1         | 0       | 4                        | 80*01       | 1         | 0       |
| 4                           | 74*01      | 1         | 0       | 4                        | 83*01       | 1         | 1       |
| 4                           | 78*01      | 1         | 0       | 5                        | 39*01       | 1         | 0       |
| 4                           | 79*01      | 1         | 0       | 5                        | 43/45*01    | 4         | 3       |
| 4                           | 80*01      | 1         | 0       | 5                        | 48*01       | 8         | 16      |
| 4                           | 91*01      | 0         | 1       | 6                        | 17*01       | 1         | 1       |
| 5                           | 39*01      | 1         | 4       | 6                        | 23*01       | 2         | 1       |
| 5                           | 43/45*01   | 1         | 1       | 6                        | 25*01       | 0         | 5       |
| 5                           | 48*01      | 0         | 2       | 8                        | 24*01       | 1         | 3       |
| 6                           | 14*01      | 1         | 1       | 8                        | 27*01       | 1         | 1       |
| 6                           | 15*01      | 2         | 1       | 8                        | 28*01       | 2         | 2       |
| 6                           | 17*01      | 3         | 3       | 8                        | 30*01       | 1         | 1       |
| 6                           | 23*01      | 6         | 4       | 9                        | 120/124*01  | 1         | 0       |
| 6                           | 25*01      | 2         | 2       | 10                       | 94*01       | 3         | 0       |
| 6                           | 32*01      | 1         | 1       | 12                       | 38*01       | 2         | 2       |
| 8                           | 19*01      | 0         | 4       | 12                       | 41*01       | 0         | 1       |
| 8                           | 21*01      | 0         | 1       | 12                       | 44*01       | 4         | 4       |
| 8                           | 24*01      | 3         | 0       | 12                       | 46*01       | 0         | 3       |
| 8                           | 27*01      | 2         | 1       | 12                       | 98*01       | 0         | 1       |
| 8                           | 28*01      | 6         | 6       | 13                       | 84*01 85*01 | 18        | 11      |
| 8                           | 30*01      | 5         | 4       | 14                       | 111*01      | 0         | 2       |
| 9                           | 120/124*01 | 1         | 2       | 14                       | 130*01      | 0         | 1       |
| 9                           | 123*01     | 0         | 7       |                          |             |           |         |
| 10                          | 94*01      | 3         | 4       |                          |             |           |         |
| 12                          | 38*01      | 2         | 2       |                          |             |           |         |
| 12                          | 44*01      | 6         | 4       |                          |             |           |         |
| 12                          | 46*01      | 5         | 11      |                          |             |           |         |
| 12                          | 98*01      | 1         | 0       |                          |             |           |         |
| 13                          | 84/85*01   | 17        | 27      |                          |             |           |         |
| 14                          | 100*01     | 1         | 1       |                          |             |           |         |
| 16                          | 104*01     | 4         | 2       |                          |             |           |         |
| 19                          | 93*01      | 0         | 2       |                          |             |           |         |
|                             | Total      | 139       | 200     |                          | Total       | 115       | 138     |

*Continued on next page*

**BAFF INHIBITION AND B-CELL SELECTION IN SLE**

**Supplementary Table S2. Continued.**

| Germinal center B cells NZW/BXSB |            |           |         | Germinal center B cells NZB/W |            |           |         |
|----------------------------------|------------|-----------|---------|-------------------------------|------------|-----------|---------|
| V $\kappa$ gene                  | V allele   | BAFF-R-Ig | Control | V $\kappa$ gene               | V allele   | BAFF-R-Ig | Control |
| 1                                | 110*01     | 10        | 3       | 1                             | 99*01      | 0         | 1       |
| 1                                | 117*01     | 1         | 1       | 1                             | 115*01     | 2         | 0       |
| 1                                | 133*01     | 0         | 1       | 1                             | 117*01     | 1         | 0       |
| 1                                | 135*01     | 2         | 2       | 1                             | 88*01      | 1         | 0       |
| 1                                | 88*01      | 0         | 1       | 3                             | 1*01       | 1         | 1       |
| 1                                | 99*01      | 1         | 0       | 3                             | 4*01       | 0         | 1       |
| 2                                | 137*01     | 2         | 2       | 3                             | 5*01       | 0         | 3       |
| 3                                | 1*01       | 0         | 4       | 3                             | 7*01       | 0         | 3       |
| 3                                | 12*01      | 8         | 1       | 3                             | 10*01      | 1         | 0       |
| 3                                | 2*01       | 2         | 2       | 3                             | 12*01      | 2         | 0       |
| 3                                | 3*01       | 0         | 2       | 4                             | 57*01      | 4         | 8       |
| 3                                | 4*01       | 2         | 8       | 4                             | 68*01      | 0         | 1       |
| 3                                | 5*01       | 1         | 2       | 4                             | 72*01      | 0         | 1       |
| 4                                | 50*01      | 2         | 0       | 4                             | 74*01      | 0         | 1       |
| 4                                | 55*01      | 3         | 0       | 4                             | 79*01      | 1         | 4       |
| 4                                | 52*01      | 0         | 1       | 5                             | 39*01      | 3         | 1       |
| 4                                | 57-1*01    | 3         | 9       | 5                             | 43/45*01   | 67        | 43      |
| 4                                | 58*01      | 1         | 0       | 5                             | 48*01      | 31        | 30      |
| 4                                | 59*01      | 2         | 1       | 6                             | 15*01      | 0         | 2       |
| 4                                | 69*01      | 1         | 0       | 6                             | 17*01      | 0         | 1       |
| 4                                | 91*01      | 1         | 0       | 6                             | 25*01      | 2         | 0       |
| 4                                | 74*01      | 1         | 1       | 9                             | 120/124*01 | 22        | 6       |
| 4                                | 79*01      | 3         | 0       | 9                             | 123*01     | 1         | 0       |
| 4                                | 61*01      | 0         | 2       | 9                             | 124*01     | 2         | 0       |
| 4                                | 63*01      | 0         | 2       | 10                            | 94*01      | 2         | 2       |
| 4                                | 73*01      | 1         | 3       | 13                            | 84/85*01   | 4         | 10      |
| 4                                | 80*01      | 0         | 1       | 14                            | 100*01     | 2         | 0       |
| 5                                | 39*01      | 0         | 1       | 14                            | 111*01     | 1         | 0       |
| 5                                | 43*01      | 115       | 52      | 16                            | 104*01     | 3         | 0       |
| 5                                | 48*01      | 18        | 35      |                               |            |           |         |
| 6                                | 15*01      | 12        | 12      |                               |            |           |         |
| 6                                | 17*01      | 0         | 1       |                               |            |           |         |
| 6                                | 20*01      | 1         | 0       |                               |            |           |         |
| 6                                | 23*01      | 0         | 4       |                               |            |           |         |
| 6                                | 25*01      | 0         | 1       |                               |            |           |         |
| 8                                | 21*01      | 0         | 11      |                               |            |           |         |
| 8                                | 24*01      | 3         | 0       |                               |            |           |         |
| 8                                | 27*01      | 1         | 0       |                               |            |           |         |
| 8                                | 30*01      | 4         | 2       |                               |            |           |         |
| 9                                | 120/124*01 | 19        | 19      |                               |            |           |         |
| 9                                | 123*01     | 1         | 1       |                               |            |           |         |
| 10                               | 94*01      | 0         | 2       |                               |            |           |         |
| 12                               | 38*01      | 0         | 1       |                               |            |           |         |
| 12                               | 44*01      | 3         | 0       |                               |            |           |         |
| 12                               | 46*01      | 2         | 1       |                               |            |           |         |
| 13                               | 84/85*01   | 3         | 3       |                               |            |           |         |
| 14                               | 100*01     | 1         | 1       |                               |            |           |         |
| 14                               | 111*01     | 6         | 1       |                               |            |           |         |
| 16                               | 104*01     | 9         | 3       |                               |            |           |         |
|                                  | Total      | 245       | 200     |                               | Total      | 153       | 119     |

*Continued on next page*

Supplementary Table S2. *Continued.*

| Plasma cells NZW/BXSB |            |           |         | Plasma cells NZB/W |            |           |         |
|-----------------------|------------|-----------|---------|--------------------|------------|-----------|---------|
| V $\kappa$ gene       | V allele   | BAFF-R-Ig | Control | V $\kappa$ gene    | V allele   | BAFF-R-Ig | Control |
| 1                     | 110*01     | 9         | 4       | 2                  | 137*01     | 1         | 0       |
| 1                     | 88*01      | 0         | 1       | 3                  | 1*01       | 1         | 0       |
| 1                     | 122*01     | 1         | 0       | 3                  | 5*01       | 0         | 1       |
| 1                     | 133*01     | 3         | 0       | 3                  | 7*01       | 0         | 1       |
| 1                     | 135*01     | 1         | 0       | 3                  | 10*01      | 4         | 0       |
| 2                     | 112*01     | 1         | 0       | 3                  | 3*01       | 1         | 0       |
| 2                     | 137*01     | 3         | 0       | 4                  | 53*01      | 1         | 0       |
| 3                     | 1*01       | 2         | 10      | 4                  | 57*01      | 1         | 0       |
| 3                     | 10*01      | 3         | 7       | 4                  | 63*01      | 0         | 1       |
| 3                     | 2*01       | 3         | 4       | 4                  | 74*01      | 1         | 0       |
| 3                     | 3*01       | 1         | 0       | 5                  | 43/45*01   | 16        | 12      |
| 3                     | 4*01       | 0         | 3       | 5                  | 48*01      | 102       | 8       |
| 3                     | 5*01       | 5         | 4       | 6                  | 17*01      | 2         | 0       |
| 3                     | 7*01       | 9         | 1       | 6                  | 23*01      | 2         | 0       |
| 3                     | 9*01       | 2         | 0       | 8                  | 24*01      | 0         | 1       |
| 4                     | 57-1*01    | 1         | 2       | 8                  | 34*01      | 0         | 1       |
| 4                     | Other      | 7         | 5       | 9                  | 120/124*01 | 18        | 0       |
| 5                     | 39*01      | 0         | 2       | 9                  | 123*01     | 2         | 0       |
| 5                     | 43/45*01   | 69        | 27      | 12                 | 46*01      | 2         | 0       |
| 5                     | 48*01      | 13        | 19      | 13                 | 84/85*01   | 3         | 1       |
| 6                     | 13*01      | 1         | 0       | 16                 | 104*01     | 2         | 0       |
| 6                     | 14*01      | 1         | 0       |                    |            |           |         |
| 6                     | 15*01      | 1         | 3       |                    |            |           |         |
| 6                     | 17*01      | 0         | 1       |                    |            |           |         |
| 6                     | 20*01      | 2         | 0       |                    |            |           |         |
| 6                     | 23*01      | 0         | 5       |                    |            |           |         |
| 6                     | 25*01      | 1         | 3       |                    |            |           |         |
| 6                     | 32*01      | 1         | 4       |                    |            |           |         |
| 8                     | 30*01      | 2         | 1       |                    |            |           |         |
| 9                     | 120/124*01 | 10        | 13      |                    |            |           |         |
| 10                    | 94*01      | 0         | 1       |                    |            |           |         |
| 10                    | 96*01      | 2         | 4       |                    |            |           |         |
| 12                    | 41*01      | 1         | 0       |                    |            |           |         |
| 12                    | 44*01      | 0         | 1       |                    |            |           |         |
| 12                    | 46*01      | 2         | 1       |                    |            |           |         |
| 13                    | 84/85*01   | 2         | 4       |                    |            |           |         |
| 14                    | 130*01     | 2         | 1       |                    |            |           |         |
| 16                    | 104*01     | 1         | 1       |                    |            |           |         |
| 17                    | 121*01     | 1         | 0       |                    |            |           |         |
| 18                    | 36*01      | 1         | 0       |                    |            |           |         |
|                       | Total      | 164       | 132     |                    |            | 159       | 26      |

**Supplementary Table S3.** Pairwise comparisons of V<sub>κ</sub> repertoires of FO, GC and PC subsets.\*

| B cell subset comparison |    | NO. V <sub>κ</sub> genes | No. genes in top 50% <sup>†</sup> | Top gene <sup>‡</sup> (% λ <sup>2</sup> ) | Individual genes contributing > 5% to the λ <sup>2</sup> analysis |          |       |      |      |          |      |
|--------------------------|----|--------------------------|-----------------------------------|-------------------------------------------|-------------------------------------------------------------------|----------|-------|------|------|----------|------|
|                          |    |                          |                                   |                                           |                                                                   |          |       |      |      |          |      |
| FNZB/W                   | FO | 43                       | 8                                 | 10.7                                      | 3-1                                                               | 6-25     | 10-94 | 3-3  | 3-4  | 13-84/85 | 4-55 |
| FNZB/W                   | GC | 30                       | 8                                 | 11.4                                      | 9-120/124                                                         | 13-84/85 | 3-5   | 4-79 | 3-7  | 6-15     | 4-57 |
| FNZB/W                   | PC | 21                       | 7                                 | 31.73                                     | 5-43/45                                                           | 8-34     | 8-24  | 4-63 | 3-7  | 3-5      | 5-48 |
| MNZW/BXSB                | FO | 51                       | 10                                | 8.6                                       | 9-123                                                             | 3-3      | 8-24  | 3-4  | 4-55 |          |      |
| MNZW/BXSB                | GC | 49                       | 7                                 | 12.7                                      | 8-21                                                              | 5-43/45  | 5-48  |      |      |          |      |
| MNZW/BXSB                | PC | 40                       | 7                                 | 14.5                                      | 5-43/45                                                           | 3-1      | 6-23  | 3-7  | 3-4  |          |      |

\*See reference 3

<sup>†</sup>Number of genes contributing the top 50% to the overall λ<sup>2</sup>

<sup>‡</sup>Percent contribution of the top gene to the overall λ<sup>2</sup>

**Supplementary Table S4.** Mutation analysis of 3H9 associated V<sub>κ</sub>5 light chains.

| Subset              | Chimera           | Number sequences | Mutations/sequence | Framework |    | CDR |                 |
|---------------------|-------------------|------------------|--------------------|-----------|----|-----|-----------------|
|                     |                   |                  |                    | S*        | R  | S   | R               |
| V <sub>κ</sub> 5-43 | 3H9 W/B           | 28               | 3.5                | 45        | 30 | 4   | 19              |
|                     | 3H9 W/B BAFF-R-Ig | 26               | 3.6                | 20        | 45 | 6   | 22              |
|                     | 3H9 B/W           | 16               | 6.3                | 10        | 45 | 3   | 43              |
|                     | 3H9 B/W BAFF-R-Ig | 18               | 4.0                | 13        | 39 | 3   | 17 <sup>†</sup> |
| V <sub>κ</sub> 5-48 | 3H9 B/W           | 19               | 4.7                | 28        | 48 | 0   | 29              |
|                     | 3H9 B/W BAFF-R-Ig | 18               | 8.8                | 41        | 72 | 7   | 38              |

\*S: silent; R: replacement

<sup>†</sup>p<0.01 compared with 3H9 B/W
